# Supplementary material for: Hidden in Plain Sight: The Role of Corporate Board of Directors in Public Charity Lobbying
Source: Atypon-hosted journal article supplement (doi:10.1287/mnsc.2023.00165), 2025-05-08
Supplement: mnsc.2023.00165.sm1.pdf [file mnsc.2023.00165.sm1.pdf]

## **Internet Appendix**

for “Hidden in Plain Sight: The Role of Corporate Board of  
Directors in Public Charity Lobbying”

by

Changhyun Ahn, Joel F. Houston, and Sehoon Kim

## A.1 Public charities and lobbying allowances

Public charities can engage in either direct or grassroots lobbying within fairly generous limits, insofar as such lobbying does not constitute a “substantial part” of the organization’s activities. While this provision is meant to leave room for charities to undertake legislative activities in furtherance of their program goals, the baseline “substantial part” test depends largely on the subjective case-by-case evaluation by the Internal Revenue Service (IRS). To avoid this subjectivity, charities may elect to subject themselves to a predefined “expenditure test” under Section 501(h) that explicitly outlines the limitations to lobbying. Under this rule, charities can spend up to 20% of the first \$500,000 of their total annual exempt purpose expenditures on lobbying, 15% of expenditures in excess of \$500,000, 10% of expenditures over \$1 million, and 5% of expenditures above \$1.5 million, with a total lobbying cap of \$1 million.<sup>1</sup> Moreover, violating such rules has modest consequences. In a given year, violating charities are levied a 25% tax on the portion of lobbying expenditures that exceed the limit, and their tax-exempt status is revoked only if their lobbying exceeds the limit by more than a 50% margin over a four-year period. Overall, public charities have considerable leeway in their ability to lobby.

## A.2 Additional tables

The following are additional tables mentioned and referred to in the paper.

---

<sup>1</sup>Grassroots lobbying is capped at 25% of the total allowable lobbying ceiling under the “expenditure test”.

**Table A.1. Top Lobbying Interests**

Panel A of this table presents for each of the Fama-French 30 industries the top three lobbying issues for each industry based on the industry's aggregate lobbying expenditures, and the percentages of the industry's aggregate lobbying expenditures spent on these top three issues. Panel B presents similar statistics for charities across different types of charity organizations as defined in the IRS Exempt Organizations Business Master File. A dictionary for the lobbying issue codes is given in Panel C.

*Panel A. Fama-French 30 Industries*

| Industries                                             | Top Lobbying Issues |            |       |            |       |            |
|--------------------------------------------------------|---------------------|------------|-------|------------|-------|------------|
|                                                        | Top 1               | % Spending | Top 2 | % Spending | Top 3 | % Spending |
| Food Products                                          | AGR                 | 19%        | FOO   | 12%        | TRD   | 12%        |
| Beer & Liquor                                          | TAX                 | 18%        | FOO   | 15%        | HCR   | 9%         |
| Tobacco Products                                       | TOB                 | 54%        | TAX   | 18%        | AGR   | 6%         |
| Recreation                                             | GAM                 | 21%        | TAX   | 16%        | TEC   | 8%         |
| Printing and Publishing                                | EDU                 | 27%        | COM   | 11%        | CPT   | 10%        |
| Consumer Goods                                         | TAX                 | 12%        | TRD   | 9%         | HCR   | 8%         |
| Apparel                                                | TRD                 | 29%        | TAX   | 15%        | SPO   | 12%        |
| Healthcare, Medical Equipment, Pharmaceutical Products | HCR                 | 26%        | MMM   | 20%        | TAX   | 11%        |
| Chemicals                                              | ENG                 | 22%        | ENV   | 9%         | TRD   | 8%         |
| Textiles                                               | TRD                 | 81%        | TAX   | 10%        | LBR   | 2%         |
| Construction and Construction Materials                | TAX                 | 24%        | ENG   | 13%        | ENV   | 6%         |
| Steel Works, etc                                       | TRD                 | 19%        | DEF   | 12%        | ENG   | 12%        |
| Fabricated Products and Machinery                      | TAX                 | 16%        | ENG   | 14%        | TRD   | 10%        |
| Electrical Equipment                                   | TAX                 | 30%        | ENG   | 22%        | DEF   | 19%        |
| Automobiles and Trucks                                 | TAX                 | 11%        | DEF   | 9%         | AUT   | 7%         |
| Aircraft, Ships, and Railroad Equipment                | DEF                 | 16%        | TAX   | 10%        | BUD   | 9%         |
| Precious Metals, Non-Metallic, Industrial Metal Mining | NAT                 | 38%        | CHM   | 10%        | TRA   | 9%         |
| Coal                                                   | ENG                 | 23%        | LBR   | 12%        | NAT   | 12%        |
| Petroleum and Natural Gas                              | ENG                 | 15%        | TAX   | 12%        | ENV   | 9%         |
| Utilities                                              | ENG                 | 19%        | UTI   | 17%        | TAX   | 13%        |
| Communication                                          | TEC                 | 27%        | COM   | 17%        | TAX   | 15%        |
| Personal and Business Services                         | TAX                 | 12%        | CPI   | 10%        | EDU   | 7%         |
| Business Equipment                                     | DEF                 | 13%        | TAX   | 10%        | TRD   | 7%         |
| Business Supplies and Shipping Containers              | TAX                 | 16%        | ENV   | 7%         | DEF   | 7%         |
| Transportation                                         | AVI                 | 15%        | TAX   | 12%        | TRA   | 12%        |
| Wholesale                                              | MMM                 | 23%        | HCR   | 20%        | ENG   | 13%        |
| Retail                                                 | TAX                 | 15%        | HCR   | 12%        | LBR   | 7%         |
| Restaurants, Hotels, Motels                            | TAX                 | 25%        | FOO   | 10%        | HCR   | 9%         |
| Banking, Insurance, Real Estate, Trading               | FIN                 | 15%        | TAX   | 14%        | BAN   | 10%        |
| Everything Else                                        | TAX                 | 13%        | DEF   | 11%        | ENV   | 8%         |

(continued)

**Table A.1. Top Lobbying Interests (continued)**

|                                                            | Top Lobbying Issues |            |       |            |       |            |
|------------------------------------------------------------|---------------------|------------|-------|------------|-------|------------|
|                                                            | Top 1               | % Spending | Top 2 | % Spending | Top 3 | % Spending |
| Charity Activities                                         |                     |            |       |            |       |            |
| Religious Activities                                       | BUD                 | 49%        | EDU   | 20%        | FOR   | 7%         |
| Schools, Colleges, and Related Activities                  | BUD                 | 20%        | HCR   | 16%        | MMM   | 12%        |
| Cultural, Historical, or Other Educational Activities      | BUD                 | 40%        | EDU   | 10%        | GOV   | 6%         |
| Other Instructions and Training Activities                 | COM                 | 22%        | CPT   | 16%        | ADV   | 16%        |
| Health Services and Related Activities                     | HCR                 | 20%        | BUD   | 19%        | MMM   | 16%        |
| Scientific Research Activities                             | HCR                 | 18%        | BUD   | 16%        | MMM   | 16%        |
| Farming and Related Activities                             | TAX                 | 98%        | AGR   | 2%         |       |            |
| Mutual Organizations                                       | EDU                 | 34%        | VET   | 30%        | BUD   | 26%        |
| Employee of Membership Benefit Organizations               | TAX                 | 11%        | HCR   | 7%         | BUD   | 7%         |
| Sports, Athletic, Recreational, and Social Activities      | BUD                 | 22%        | EDU   | 13%        | IMM   | 9%         |
| Youth Activities                                           | BUD                 | 35%        | EDU   | 9%         | HCR   | 7%         |
| Conservation, Environmental, and Beautification Activities | NAT                 | 18%        | BUD   | 14%        | TAX   | 11%        |
| Housing Activities                                         | HOU                 | 23%        | TAX   | 20%        | BUD   | 19%        |
| Inner City or Community Activities                         | BUD                 | 26%        | EDU   | 17%        | TAX   | 14%        |
| Civil Rights Activities                                    | FOR                 | 11%        | RES   | 11%        | CIV   | 9%         |
| Legislative and Political Activities                       | BUD                 | 8%         | TRD   | 7%         | TAX   | 7%         |
| Advocacy                                                   | BUD                 | 19%        | FOR   | 16%        | DEF   | 15%        |
| Other Activities Directed to Individuals                   | TAX                 | 9%         | AGR   | 7%         | HCR   | 7%         |
| Activities Purposes and Activities                         | BUD                 | 36%        | EDU   | 12%        | TAX   | 7%         |
| Other Purposes and Activities                              | BUD                 | 14%        | HCR   | 8%         | TAX   | 7%         |

(continued)

**Table A.1. Top Lobbying Interests (continued)***Panel C. LDA Issue Dictionary*


---

|     |                                        |     |                                         |
|-----|----------------------------------------|-----|-----------------------------------------|
| ACC | Accounting                             | HCR | Health Issues                           |
| ADV | Advertising                            | HOU | Housing                                 |
| AER | Aerospace                              | IMM | Immigration                             |
| AGR | Agriculture                            | IND | Indian/Native American Affairs          |
| ALC | Alcohol & Drug Abuse                   | INS | Insurance                               |
| ANI | Animals                                | LBR | Labor Issues/Antitrust/Workplace        |
| APP | Apparel/Clothing Industry/Textiles     | LAW | Law Enforcement/Crime/Criminal Justice  |
| ART | Arts/Entertainment                     | MAN | Manufacturing                           |
| AUT | Automotive Industry                    | MAR | Marine/Maritime/Boating/Fisheries       |
| AVI | Aviation/Aircraft/Airlines             | MIA | Media (Information/Publishing)          |
| BAN | Banking                                | MED | Medical/Disease Research/Clinical Labs  |
| BNK | Bankruptcy                             | MMM | Medicare/Medicaid                       |
| BEV | Beverage Industry                      | MON | Minting/Money/Gold Standard             |
| BUD | Budget/Appropriations                  | NAT | Natural Resources                       |
| CHM | Chemicals/Chemical Industry            | PHA | Pharmacy                                |
| CIV | Civil Rights/Civil Liberties           | POS | Postal                                  |
| CAW | Clean Air & Water (Quality)            | RRR | Railroads                               |
| CDT | Commodities (Big Ticket)               | RES | Real Estate/Land Use/Conservation       |
| COM | Communications/Broadcasting/Radio/TV   | REL | Religion                                |
| CPI | Computer Industry                      | RET | Retirement                              |
| CSP | Consumer Issues/Safety/Protection      | ROD | Roads/Highway                           |
| CON | Constitution                           | SCI | Science/Technology                      |
| CPT | Copyright/Patent/Trademark             | SMB | Small Business                          |
| DEF | Defense                                | SPO | Sports/Athletics                        |
| DOC | District of Columbia                   | TAX | Taxation/Internal Revenue Code          |
| DIS | Disaster Planning/Emergencies          | TEC | Telecommunications                      |
| ECN | Economics/Economic Development         | TOB | Tobacco                                 |
| EDU | Education                              | TOR | Torts                                   |
| ENG | Energy/Nuclear                         | TRD | Trade (Domestic & Foreign)              |
| ENV | Environmental/Superfund                | TRA | Transportation                          |
| FAM | Family Issues/Abortion/Adoption        | TOU | Travel/Tourism                          |
| FIR | Firearms/Guns/Ammunition               | TRU | Trucking/Shipping                       |
| FIN | Financial Inst./Investments/Securities | URB | Urban Development/Municipalities        |
| FOO | Food Industry (Safety, Labeling, etc.) | UNM | Unemployment                            |
| FOR | Foreign Relations                      | UTI | Utilities                               |
| FUE | Fuel/Gas/Oil                           | VET | Veterans                                |
| GAM | Gaming/Gambling/Casino                 | WAS | Waste (Hazard/Solid/Interstate/Nuclear) |
| GOV | Government Issues                      | WEL | Welfare                                 |

---

**Table A.2. Corporate Directors on Charity Boards**

This table presents summary statistics of corporate directors and their charity board memberships over the period from 1999 to 2017, for the sample of firms that exhibit lobbying activity at some point throughout the sample period. The number of firms and the average number of directors per firm, as well as the average number of directors per firm who have charity board memberships are shown for each year. The fraction of firms that have a director who is on a charity board, as well as the fraction of all directors who serve on charity boards are also shown for each year. The full sample time-series averages are shown at the bottom.

| Year    | No. Firms | No. Directors |             | % of Firms Connected<br>to Charities | % of Directors<br>on Charity Boards |
|---------|-----------|---------------|-------------|--------------------------------------|-------------------------------------|
|         |           | All           | Charity Brd |                                      |                                     |
| 1999    | 870       | 7.99          | 0.76        | 48.85%                               | 8.83%                               |
| 2000    | 904       | 9.30          | 0.91        | 55.20%                               | 9.08%                               |
| 2001    | 935       | 10.28         | 1.02        | 59.79%                               | 9.33%                               |
| 2002    | 954       | 10.36         | 1.08        | 63.84%                               | 9.95%                               |
| 2003    | 969       | 10.46         | 1.11        | 65.12%                               | 10.29%                              |
| 2004    | 996       | 10.46         | 1.13        | 66.16%                               | 10.43%                              |
| 2005    | 1003      | 10.50         | 1.19        | 66.80%                               | 10.83%                              |
| 2006    | 998       | 10.55         | 1.20        | 67.43%                               | 11.01%                              |
| 2007    | 984       | 10.60         | 1.20        | 67.38%                               | 10.88%                              |
| 2008    | 959       | 10.61         | 1.22        | 68.72%                               | 11.17%                              |
| 2009    | 943       | 10.55         | 1.21        | 69.88%                               | 11.21%                              |
| 2010    | 933       | 10.51         | 1.24        | 70.53%                               | 11.54%                              |
| 2011    | 930       | 10.56         | 1.26        | 72.58%                               | 11.79%                              |
| 2012    | 918       | 10.50         | 1.28        | 73.53%                               | 12.05%                              |
| 2013    | 914       | 10.59         | 1.33        | 73.41%                               | 12.38%                              |
| 2014    | 917       | 10.53         | 1.28        | 71.76%                               | 12.05%                              |
| 2015    | 912       | 10.63         | 1.25        | 71.27%                               | 11.53%                              |
| 2016    | 865       | 10.67         | 1.20        | 70.75%                               | 11.11%                              |
| 2017    | 830       | 10.77         | 1.12        | 67.95%                               | 10.32%                              |
| Average | 933       | 10.35         | 1.16        | 66.93%                               | 10.84%                              |

**Table A.3. Robustness of Main Results**

This table presents results from alternative specifications for our main regressions of connected charity lobbying (*CCL*) on *Connected*<sub>*i,j,t-1*</sub>, a dummy variable equal to one if firm *i* and charity *j* shared a director on their boards in year *t* - 1 and zero otherwise. Columns 1 to 5 report alternative results from using *CCL* divided by lagged charity assets as the dependent variable. Columns 1-3 replace firm-by-charity and year fixed effects with firm-by-year and charity fixed effects, charity-by-year and firm fixed effects, or firm-by-year and charity-by-year fixed effects, respectively. Columns 4 to 9 alternatively adjust standard errors for clustering at the firm, charity, year, firm-by-year, charity-by-year, or firm industry-by-year levels, rather than at the firm-by-charity level. Column 10 uses *CCL Bill Scaled* as the dependent variable, alternatively adjusting for standard error clustering at the firm industry-by-charity level. Columns 11-12 estimate probit or logit models using as the dependent variable an indicator for whether *CCLVS* is positive, controlling for firm-by-charity and year fixed effects, and adjusting for standard error clustering at the firm-by-charity level.

|                                | Dependent Variable:  |                      |                      |                      |                      |                      |                      |                      |                      |                     |                     |                     |                    |       |
|--------------------------------|----------------------|----------------------|----------------------|----------------------|----------------------|----------------------|----------------------|----------------------|----------------------|---------------------|---------------------|---------------------|--------------------|-------|
|                                | CCL Scaled           |                      |                      |                      |                      |                      | CCL Bill Scaled      |                      |                      |                     |                     |                     | <i>I</i> (CCLVS>0) |       |
|                                | (1)                  | (2)                  | (3)                  | (4)                  | (5)                  | (6)                  | (7)                  | (8)                  | (9)                  | (10)                | (11)                | (12)                | Probit             | Logit |
| Connected                      | 0.014***<br>(0.005)  | 0.011***<br>(0.004)  | 0.012**<br>(0.006)   | 0.011***<br>(0.004)  | 0.011**<br>(0.005)   | 0.011***<br>(0.003)  | 0.011***<br>(0.002)  | 0.011***<br>(0.002)  | 0.011**<br>(0.005)   | 0.004***<br>(0.001) | 0.023**<br>(0.010)  | 0.024**<br>(0.010)  |                    |       |
| log(Charity Assets)            | -0.056***<br>(0.009) | -0.050***<br>(0.009) | -0.050***<br>(0.006) | -0.050***<br>(0.009) | -0.050***<br>(0.015) | -0.050***<br>(0.014) | -0.050***<br>(0.008) | -0.050***<br>(0.014) | -0.050***<br>(0.009) | -0.012**<br>(0.005) | -0.020*<br>(0.011)  | -0.017<br>(0.012)   |                    |       |
| log(Firm Assets)               |                      | 0.021***<br>(0.005)  |                      | 0.024***<br>(0.006)  | 0.024*<br>(0.012)    | 0.024***<br>(0.004)  | 0.024***<br>(0.003)  | 0.024***<br>(0.004)  | 0.024**<br>(0.011)   | -0.000<br>(0.001)   | 0.082***<br>(0.012) | 0.082***<br>(0.012) |                    |       |
| ROA                            |                      | 0.060***<br>(0.023)  |                      | 0.064***<br>(0.025)  | 0.064<br>(0.051)     | 0.064***<br>(0.017)  | 0.064***<br>(0.018)  | 0.064***<br>(0.023)  | 0.064<br>(0.053)     | 0.011<br>(0.008)    | 0.119***<br>(0.044) | 0.121***<br>(0.044) |                    |       |
| Q                              |                      | 0.003<br>(0.003)     |                      | 0.003<br>(0.003)     | 0.003<br>(0.002)     | 0.003<br>(0.002)     | 0.003*<br>(0.002)    | 0.003*<br>(0.002)    | 0.003<br>(0.002)     | 0.000<br>(0.001)    | 0.016***<br>(0.005) | 0.016***<br>(0.005) |                    |       |
| Firm Debt/Assets               |                      | -0.030<br>(0.019)    |                      | -0.022<br>(0.019)    | -0.022<br>(0.030)    | -0.022*<br>(0.012)   | -0.022*<br>(0.013)   | -0.022*<br>(0.013)   | -0.022<br>(0.023)    | 0.007*<br>(0.004)   | -0.023<br>(0.046)   | -0.030<br>(0.046)   |                    |       |
| Observations                   | 54,185               | 54,509               | 51,542               | 56,559               | 56,559               | 56,559               | 56,559               | 56,559               | 56,559               | 54,206              | 21,918              | 21,918              |                    |       |
| Firm-Year FE                   | Yes                  | No                   | Yes                  | No                   | No                   | No                   | No                   | No                   | No                   | No                  | No                  | No                  | No                 | No    |
| Charity-Year FE                | No                   | Yes                  | Yes                  | No                   | No                   | No                   | No                   | No                   | No                   | No                  | No                  | No                  | No                 | No    |
| Firm FE                        | No                   | Yes                  | No                   | No                  | No                  | No                  | No                 | No    |
| Charity FE                     | Yes                  | No                   | No                  | No                  | No                  | No                 | No    |
| Firm-Charity FE                | No                   | No                   | No                   | Yes                  | Yes                  | Yes                  | Yes                  | Yes                  | Yes                  | Yes                 | Yes                 | Yes                 | Yes                | Yes   |
| Year FE                        | No                   | No                   | No                   | Yes                  | Yes                  | Yes                  | Yes                  | Yes                  | Yes                  | Yes                 | Yes                 | Yes                 | Yes                | Yes   |
| SE Clustering                  |                      | Firm-by-Charity      |                      | Firm                 | Charity              | Year                 | Firm-by-Year         | Charity-by-Year      | Industry-by-Charity  |                     |                     |                     | Firm-by-Charity    |       |
| Adj (or Pseudo) R <sup>2</sup> | 0.545                | 0.605                | 0.571                | 0.687                | 0.687                | 0.687                | 0.687                | 0.687                | 0.687                | 0.554               | 0.298               | 0.300               |                    |       |

**Table A.4. Educational Charities and Pro-Finance/Defense Lobbying**

This table presents univariate comparisons of the likelihood of lobbying or commenting on legislation bills by educational charities that are connected to firms in specific industries and educational charities that are not connected. Panel A (Panel B) focuses on whether educational charities are connected to finance related firms (defense related firms) and examines the likelihood of lobbying in topics related to banking/finance (defense), or the likelihood of commenting on legislation bills related to banking/finance (defense) in the same direction as their connected financial (defense) firms. Finance (defense) related firms are defined as firms in industry 29 (industries 12-16) of the Fama-French 30 industries. Finance (defense) related LDA topics include BAN, FIN, INS, MON, and RES (AER, DEF, and FOR). Finance (defense) related legislation bills are those with names that include the phrases “invest”, “financ”, “bank”, “wall street”, “loan”, “lending”, “borrow”, “capital”, “dodd-frank”, “jobs act”, “jumpstart our business startups”, or “insurance” (“national security”, “defense”, “military”, “intelligence”, “war”, “arms”, “armed”, “army”, “aero”, “missile”, “navy”, “naval”, “infantry”, or “geopolitic”). The differences in likelihoods between connected and unconnected charities and their one-tailed p-values are reported. Standard errors of likelihoods are reported in parentheses.

|                                                                               | Connected        | Unconnected      | Diff             | p-value<br>(C > U) |
|-------------------------------------------------------------------------------|------------------|------------------|------------------|--------------------|
|                                                                               | (1)              | (2)              | (3)              | (4)                |
| <i>Panel A. Connections between Educational Charities and Financial Firms</i> |                  |                  |                  |                    |
| Lobby in Bank/Finance Issues                                                  | 0.041<br>(0.005) | 0.031<br>(0.003) | 0.009<br>(0.006) | 0.05               |
| Bill Position Aligned with Financial Firms                                    | 0.037<br>(0.018) | 0.006<br>(0.003) | 0.031<br>(0.011) | 0.00               |
| <i>Panel B. Connections between Educational Charities and Defense Firms</i>   |                  |                  |                  |                    |
| Lobby in Defense Issues                                                       | 0.185<br>(0.010) | 0.074<br>(0.005) | 0.110<br>(0.010) | 0.00               |
| Bill Position Aligned with Defense Firms                                      | 0.023<br>(0.023) | 0.011<br>(0.004) | 0.012<br>(0.017) | 0.25               |

**Table A.5. Summary Statistics of Matched Sample for Director Turnover and Addition Tests**

This table presents descriptive statistics for the matched samples used for the director turnover (Panel A) and addition (Panel B) tests in Section 3. The table reports for the main sample the distributions of variables and the differences of their means (and their t-statistics) between connected and unconnected firm-charity observations. Reported in Panel B are: alternative measures of connected charity lobbying (i.e., *CCL*, *CCLS*, *CCLVS*,  $I(CCLVS > 0)$ ), and *CCL Bill*, the number of connected firms per charity, charity grant and donation receipts, charity assets, the fraction of different charity types (i.e., 501(c)(3)s, education/health/science organizations, and interest/advocacy groups), the number of firms that make charitable donations (i.e., donor firms), the number of connected charities per firm, firm assets, firm Tobin's Q, firm leverage (i.e., debt-to-assets), firm profitability (ROA), firm lobbying expenditures, and firm government contracts.

*Panel A. Director Turnover Sample*

|                                     | Treated<br>(C=410, F=929) |          |       | Control<br>(C=287, F=624) |          |       | Diff    | t-stat |
|-------------------------------------|---------------------------|----------|-------|---------------------------|----------|-------|---------|--------|
|                                     | Mean                      | St.Dev   | 75%   | Mean                      | St.Dev   | 75%   |         |        |
| <i>Charity-Firm Pairs</i>           |                           |          |       |                           |          |       |         |        |
| CCL (\$ thousand)                   | 54.92                     | 255.39   | 13.41 | 76.96                     | 344.53   | 11.25 | -22.04  | -2.41  |
| CCLS (\$ thousand)                  | 37.72                     | 197.49   | 0.00  | 48.80                     | 243.62   | 0.00  | -11.07  | -1.65  |
| CCLVS (\$ thousand)                 | 132.76                    | 682.35   | 0.00  | 151.19                    | 743.63   | 0.00  | -18.43  | -0.85  |
| $I(CCLVS > 0)$                      | 0.15                      | 0.36     | 0.00  | 0.14                      | 0.35     | 0.00  | 0.01    | 0.67   |
| CCL Bill (\$ thousand)              | 17.74                     | 53.14    | 0.00  | 23.31                     | 66.95    | 0.00  | -5.57   | -3.05  |
| <i>Charities</i>                    |                           |          |       |                           |          |       |         |        |
| No. Connected Firms                 | 1.05                      | 0.21     | 1.00  | 1.09                      | 0.29     | 1.00  | -0.04   | -4.27  |
| Grant Receipts (\$ million)         | 127.74                    | 232.46   | 6.93  | 144.02                    | 245.28   | 7.60  | -16.29  | -1.85  |
| Assets (\$ million)                 | 1,179.54                  | 2,028.80 | 73.17 | 1,357.00                  | 2,159.24 | 84.35 | -177.46 | -2.34  |
| Fraction of Charity Types           |                           |          |       |                           |          |       |         |        |
| 501(c)(3)                           | 0.92                      |          |       | 0.93                      |          |       | -0.01   | -0.47  |
| Education/Health/Science            | 0.72                      |          |       | 0.77                      |          |       | -0.05   | -1.46  |
| Interest Groups/Advocacy            | 0.05                      |          |       | 0.03                      |          |       | 0.03    | 1.65   |
| <i>Firms</i>                        |                           |          |       |                           |          |       |         |        |
| Donor Firms                         | 0.18                      |          |       | 0.22                      |          |       | -0.04   | -1.93  |
| No. Connected Charities             | 1.05                      | 0.22     | 1.00  | 1.11                      | 0.31     | 1.00  | -0.06   | -5.88  |
| Assets (\$ billion)                 | 61.61                     | 206.44   | 1.93  | 63.88                     | 228.34   | 2.22  | -2.27   | -0.32  |
| Tobin's Q                           | 1.85                      | 1.20     | 1.13  | 1.93                      | 1.26     | 1.13  | -0.08   | -1.83  |
| Debt/Assets                         | 0.27                      | 0.19     | 0.12  | 0.25                      | 0.18     | 0.11  | 0.01    | 2.24   |
| ROA                                 | 0.00                      | 0.15     | 0.00  | 0.01                      | 0.14     | 0.01  | -0.01   | -1.90  |
| Lobbying Expenditures (\$ thousand) | 1,288.36                  | 2,646.18 | 0.00  | 1,268.94                  | 2,629.81 | 0.00  | 19.42   | 0.22   |
| Government Contracts (\$ million)   | 242.16                    | 938.40   | 0.02  | 271.38                    | 970.68   | 0.01  | -29.21  | -0.65  |

(continued)

**Table A.5. Summary Statistics of Matched Sample for Director Turnover and Addition Tests (continued)**

*Panel B. Director Addition Sample*

|                                     | Treated<br>(C=426, F=1,098) |          |       | Control<br>(C=257, F=468) |          |       | Diff    | t-stat |
|-------------------------------------|-----------------------------|----------|-------|---------------------------|----------|-------|---------|--------|
|                                     | Mean                        | St.Dev   | 75%   | Mean                      | St.Dev   | 75%   |         |        |
| <i>Charity-Firm Pairs</i>           |                             |          |       |                           |          |       |         |        |
| CCL (\$ thousand)                   | 29.81                       | 115.79   | 0.00  | 36.01                     | 131.90   | 0.00  | -6.19   | -1.69  |
| CCLS (\$ thousand)                  | 16.40                       | 64.72    | 0.00  | 19.35                     | 73.42    | 0.00  | -2.96   | -1.45  |
| CCLVS (\$ thousand)                 | 75.34                       | 385.99   | 0.00  | 108.87                    | 499.23   | 0.00  | -33.53  | -2.57  |
| I(CCLVS>0)                          | 0.12                        | 0.33     | 0.00  | 0.13                      | 0.34     | 0.00  | -0.01   | -1.07  |
| CCL Bill (\$ thousand)              | 13.95                       | 47.41    | 0.00  | 13.14                     | 45.01    | 0.00  | 0.81    | 0.59   |
| <i>Charities</i>                    |                             |          |       |                           |          |       |         |        |
| Grant Receipts (\$ million)         | 117.11                      | 221.14   | 6.57  | 120.70                    | 217.28   | 6.95  | -3.59   | -0.44  |
| Assets (\$ million)                 | 988.18                      | 1,833.08 | 54.69 | 1,093.47                  | 1,906.25 | 80.73 | -105.29 | -1.54  |
| <i>Fraction of Charity Types</i>    |                             |          |       |                           |          |       |         |        |
| 501(c)(3)                           | 0.92                        |          |       | 0.95                      |          |       | -0.02   | -1.15  |
| Education/Health/Science            | 0.72                        |          |       | 0.75                      |          |       | -0.03   | -0.93  |
| Interest Groups/Advocacy            | 0.05                        |          |       | 0.03                      |          |       | 0.02    | 1.14   |
| <i>Firms</i>                        |                             |          |       |                           |          |       |         |        |
| Donor Firms                         | 0.16                        |          |       | 0.25                      |          |       | -0.09   | -4.34  |
| Assets (\$ billion)                 | 41.62                       | 139.38   | 1.24  | 61.47                     | 198.32   | 1.30  | -19.85  | -3.63  |
| Tobin's Q                           | 2.02                        | 1.49     | 1.14  | 1.96                      | 1.36     | 1.13  | 0.07    | 1.36   |
| Debt/Assets                         | 0.25                        | 0.19     | 0.08  | 0.26                      | 0.19     | 0.11  | -0.01   | -2.19  |
| ROA                                 | 0.00                        | 0.17     | 0.00  | 0.01                      | 0.15     | 0.01  | -0.01   | -1.52  |
| Lobbying Expenditures (\$ thousand) | 994.57                      | 2,329.05 | 0.00  | 1,136.29                  | 2,614.45 | 0.00  | -141.72 | -1.76  |
| Government Contracts (\$ million)   | 213.64                      | 847.07   | 0.00  | 211.33                    | 881.81   | 0.00  | 2.32    | 0.05   |

**Table A.6. Changes in Board Connections from Director Turnovers**

This table presents results from firm-charity-year level difference-in-differences regressions of  $CCL Scaled_{i,j,t}$  on  $Turnover_{i,j}$ , a dummy variable equal to one if a firm-charity pair loses a board connection due to a director turnover in either the firm or charity and zero otherwise, and its interaction with  $After_{i,j,t}$ , which is a dummy variable equal to one if the firm-charity-year observation is within three years of a turnover event year (for treated firm-charity pairs) or a pseudo-event year (for matched firm-charity pairs). The regression is run within a six-year window, three years before and after, around the turnover event year (or pseudo-event year for the control pair).

$$CCL Scaled_{i,j,t} = \beta \cdot Turnover_{i,j} \times After_{i,j,t} + \lambda \cdot Controls_{i,j,t-1} + \alpha_{i,j} + \alpha_t + \epsilon_{i,j,t}$$

Treated firm-charity pairs are matched with control firm-charity pairs in the same year with the closest propensity score, estimated in a logistic model using firm asset size and charity asset size as of the year before the turnover event as well as firm industry and charity type fixed effects. Since director turnovers are staggered, we stack our treatment and control samples within each turnover year “cohort” and choose control firm-charity groups that never experience turnovers (i.e., “never treated controls”). We report results for alternative measures of connected charity lobbying (i.e.,  $CCLS$ ,  $CCLVS$ , and  $I(CCLVS > 0)$ ), each divided by lagged charity assets. We consider subsets of turnovers occurring in charities, firms, or both. We control for the logarithm of charity assets and several firm characteristics including the log of total assets, ROA, Tobin’s Q, and total debt as a fraction of assets, all measured at  $t - 1$ . Firm-by-charity-by-cohort and year-by-cohort fixed effects are included as well. Standard errors are clustered at the firm-by-charity level (\*\*\*)  $p < 0.01$ , \*\*  $p < 0.05$ , \*  $p < 0.1$ ).

|                        | Dependent Variable (Scaled by Charity Assets): |                           |                            |                         |                         |                         |                                 |                          |                         |
|------------------------|------------------------------------------------|---------------------------|----------------------------|-------------------------|-------------------------|-------------------------|---------------------------------|--------------------------|-------------------------|
|                        | Departure from charity                         |                           |                            | Departure from firm     |                         |                         | Departure from firm and charity |                          |                         |
|                        | CCLS                                           | CCLVS                     | $I(CCLVS > 0)$             | CCLS                    | CCLVS                   | $I(CCLVS > 0)$          | CCLS                            | CCLVS                    | $I(CCLVS > 0)$          |
| Turnover × After       | (1)<br>-0.014**<br>(0.006)                     | (2)<br>-0.037*<br>(0.020) | (3)<br>-0.033**<br>(0.014) | (4)<br>0.003<br>(0.013) | (5)<br>0.016<br>(0.058) | (6)<br>0.006<br>(0.016) | (7)<br>-0.016<br>(0.012)        | (8)<br>-0.070<br>(0.050) | (9)<br>0.011<br>(0.012) |
| log(Charity Assets)    | -0.010<br>(0.021)                              | -0.024<br>(0.053)         | 0.004<br>(0.018)           | -0.050<br>(0.059)       | -0.242<br>(0.212)       | 0.013<br>(0.032)        | -0.115***<br>(0.034)            | -0.631***<br>(0.170)     | -0.007<br>(0.018)       |
| log(Firm Assets)       | 0.011*<br>(0.007)                              | 0.030<br>(0.023)          | 0.029*<br>(0.017)          | -0.000<br>(0.018)       | -0.032<br>(0.085)       | 0.038<br>(0.024)        | -0.010<br>(0.018)               | -0.051<br>(0.070)        | -0.007<br>(0.016)       |
| ROA                    | 0.025<br>(0.034)                               | -0.001<br>(0.082)         | 0.051<br>(0.057)           | -0.039<br>(0.111)       | -0.299<br>(0.391)       | 0.053<br>(0.067)        | 0.063<br>(0.077)                | -0.093<br>(0.235)        | 0.077<br>(0.049)        |
| Q                      | 0.005<br>(0.005)                               | 0.015<br>(0.014)          | -0.001<br>(0.011)          | -0.006<br>(0.011)       | -0.027<br>(0.039)       | 0.015*<br>(0.008)       | -0.010<br>(0.009)               | -0.030<br>(0.030)        | -0.008<br>(0.007)       |
| Firm Debt/Assets       | -0.037<br>(0.041)                              | -0.174<br>(0.144)         | 0.110<br>(0.080)           | 0.019<br>(0.083)        | 0.343<br>(0.347)        | 0.142*<br>(0.080)       | -0.176<br>(0.142)               | -0.415<br>(0.314)        | -0.092<br>(0.072)       |
| Observations           | 7,872                                          | 7,872                     | 7,872                      | 5,616                   | 5,616                   | 5,616                   | 9,014                           | 9,014                    | 9,014                   |
| Firm-Charity-Cohort FE | Yes                                            | Yes                       | Yes                        | Yes                     | Yes                     | Yes                     | Yes                             | Yes                      | Yes                     |
| Year-Cohort FE         | Yes                                            | Yes                       | Yes                        | Yes                     | Yes                     | Yes                     | Yes                             | Yes                      | Yes                     |
| Adj R <sup>2</sup>     | 0.665                                          | 0.489                     | 0.495                      | 0.708                   | 0.565                   | 0.523                   | 0.698                           | 0.561                    | 0.566                   |

**Table A.7. Industry Competition (Assets HHI) and CCL**

This table presents results from firm-charity-year level OLS regressions estimated on subsamples sorted on lagged industry competition of firms, following the regression equation:

$$Y_{i,j,t} = \beta \cdot \text{Connected}_{i,j,t-1} + \lambda \cdot \text{Controls}_{i,j,t-1} + \alpha_{i,j} + \alpha_t + \epsilon_{i,j,t}$$

$\text{Connected}_{i,j,t-1}$  is a dummy variable equal to one if firm  $i$  and charity  $j$  shared a director on their boards in year  $t - 1$  and zero otherwise. The outcome variable is  $CCLVS$  or  $CCL\ Industry$ , divided by lagged charity assets. Columns 1 to 4 (5 to 8) show results for the high (low)-competition subsample with respect to the sample median. Industry competition is measured for each firm in year  $t - 1$  based on the Herfindahl-Hirschman Index (HHI) of the assets of firms in the same Fama-French 30 industry, excluding the focal firm itself. In all specifications, we control for the logarithm of charity assets and several firm characteristics including the log of total assets, ROA, Tobin's Q, and total debt as a fraction of assets, all measured at  $t - 1$ . In even-numbered columns, we additionally control for  $CCL\ Industry$  ( $CCLVS$ ) when the outcome variable is  $CCLVS$  ( $CCL\ Industry$ ). Firm-by-charity and year fixed effects are included as well. Standard errors are clustered at the firm-by-charity level (\*\*\*)  $p < 0.01$ , \*\*  $p < 0.05$ , \*  $p < 0.1$ ).

|                     | Dependent Variable (Scaled by Charity Assets): |                     |                      |                      |                            |                     |                      |                      |
|---------------------|------------------------------------------------|---------------------|----------------------|----------------------|----------------------------|---------------------|----------------------|----------------------|
|                     | CCLVS                                          |                     | CCL Industry         |                      | CCLVS                      |                     | CCL Industry         |                      |
|                     | High Competition Industries                    |                     |                      |                      | Low Competition Industries |                     |                      |                      |
|                     | (1)                                            | (2)                 | (3)                  | (4)                  | (5)                        | (6)                 | (7)                  | (8)                  |
| Connected           | 0.029**<br>(0.012)                             | 0.020*<br>(0.012)   | 0.012**<br>(0.006)   | 0.008<br>(0.006)     | 0.002<br>(0.014)           | 0.001<br>(0.014)    | 0.001<br>(0.006)     | 0.000<br>(0.006)     |
| CCL Industry        |                                                | 0.703***<br>(0.073) |                      |                      |                            | 0.977***<br>(0.121) |                      |                      |
| CCLVS               |                                                |                     |                      | 0.149***<br>(0.014)  |                            |                     |                      | 0.089***<br>(0.010)  |
| log(Charity Assets) | -0.093***<br>(0.023)                           | -0.025<br>(0.021)   | -0.096***<br>(0.017) | -0.082***<br>(0.017) | -0.143***<br>(0.040)       | -0.081**<br>(0.032) | -0.064***<br>(0.016) | -0.051***<br>(0.014) |
| log(Firm Assets)    | 0.066***<br>(0.014)                            | 0.047***<br>(0.010) | 0.028***<br>(0.008)  | 0.018***<br>(0.006)  | 0.029<br>(0.019)           | 0.003<br>(0.018)    | 0.027***<br>(0.008)  | 0.024***<br>(0.007)  |
| ROA                 | 0.102*<br>(0.055)                              | 0.054<br>(0.041)    | 0.068*<br>(0.036)    | 0.053*<br>(0.030)    | 0.050<br>(0.076)           | 0.057<br>(0.067)    | -0.007<br>(0.024)    | -0.012<br>(0.021)    |
| Q                   | 0.012*<br>(0.007)                              | 0.008<br>(0.005)    | 0.006<br>(0.004)     | 0.004<br>(0.004)     | -0.003<br>(0.009)          | -0.012<br>(0.008)   | 0.009***<br>(0.003)  | 0.009***<br>(0.003)  |
| Firm Debt/Assets    | -0.049<br>(0.055)                              | -0.015<br>(0.045)   | -0.048<br>(0.031)    | -0.041<br>(0.027)    | -0.116<br>(0.080)          | -0.115<br>(0.076)   | -0.000<br>(0.022)    | 0.010<br>(0.021)     |
| Observations        | 28,045                                         | 28,045              | 28,045               | 28,045               | 27,890                     | 27,890              | 27,890               | 27,890               |
| Firm-Charity FE     | Yes                                            | Yes                 | Yes                  | Yes                  | Yes                        | Yes                 | Yes                  | Yes                  |
| Year FE             | Yes                                            | Yes                 | Yes                  | Yes                  | Yes                        | Yes                 | Yes                  | Yes                  |
| Adj R <sup>2</sup>  | 0.606                                          | 0.647               | 0.715                | 0.745                | 0.568                      | 0.605               | 0.701                | 0.727                |

**Table A.8. Governmental Procurement Contracts to Firms: ESG Subsamples**

This table presents subsample results from firm-agency-year level OLS regressions of the signed pseudo-logarithm of the difference between government procurement contracts received by firm  $i$  from agency  $k$  over the next three years and the previous three years (i.e.,  $\widehat{\log}(\frac{\Delta}{-3,+3} Proc)_{i,k,t}$ , following the algorithm of Goldman, Rocholl, and So, 2013), on  $\log(CLA)_{i,k,t-1}$  denoting the lagged value of the logarithm of the total amount spent by all charities that share board connections with firm  $i$  on lobbying agency  $k$ .

$$\widehat{\log}(\frac{\Delta}{-3,+3} Proc)_{i,k,t} = \beta \cdot \log(CLA)_{i,k,t-1} + \lambda \cdot Controls_{i,k,t-1} + \alpha_i + \alpha_k + \alpha_t + \epsilon_{i,k,t}$$

Firm-agency-year or firm-year level control variables include the amount firm  $i$  itself spends lobbying agency  $k$  (i.e., FLA), firm  $i$ 's corporate PAC donations during the previous election cycle (i.e., PAC), log of total assets, ROA, Tobin's Q, and total debt as a fraction of assets, all measured at  $t - 1$ . Combinations of firm, agency, and year fixed effects are included as well. The table reports results for subsamples sorted on firms' lagged Refinitiv ESG scores with respect to the sample median. Standard errors are clustered at the firm-agency level (\*\*\*)  $p < 0.01$ , \*\*  $p < 0.05$ , \*  $p < 0.1$ .

|                    | Dependent Variable: $\widehat{\log}(\frac{\Delta}{-3,+3} Proc)$ |                     |                     |                      |                      |                   |
|--------------------|-----------------------------------------------------------------|---------------------|---------------------|----------------------|----------------------|-------------------|
|                    | High ESG Score Firms                                            |                     |                     | Low ESG Score Firms  |                      |                   |
|                    | (1)                                                             | (2)                 | (3)                 | (4)                  | (5)                  | (6)               |
| log(CLA)           | -0.023<br>(0.037)                                               | -0.024<br>(0.038)   | -0.020<br>(0.044)   | 0.089**<br>(0.037)   | 0.102***<br>(0.038)  | 0.081*<br>(0.046) |
| log(FLA)           | 0.229***<br>(0.044)                                             | 0.223***<br>(0.046) | 0.232***<br>(0.049) | 0.045<br>(0.069)     | 0.054<br>(0.072)     | 0.068<br>(0.082)  |
| log(PAC)           | -0.437<br>(0.389)                                               | -0.254<br>(0.393)   |                     | 0.407<br>(0.294)     | 0.383<br>(0.288)     |                   |
| log(Firm Assets)   | -0.157<br>(1.207)                                               | 0.084<br>(1.231)    |                     | -0.581<br>(1.208)    | -0.688<br>(1.213)    |                   |
| ROA                | 4.118<br>(5.638)                                                | 4.060<br>(5.750)    |                     | -12.961**<br>(5.671) | -12.821**<br>(5.793) |                   |
| Q                  | -0.397<br>(0.703)                                               | -0.371<br>(0.684)   |                     | -0.304<br>(0.559)    | -0.345<br>(0.570)    |                   |
| Firm Debt/Assets   | -4.700<br>(4.376)                                               | -3.905<br>(4.370)   |                     | 7.904*<br>(4.113)    | 8.122*<br>(4.186)    |                   |
| Observations       | 5,512                                                           | 5,490               | 5,279               | 5,033                | 4,986                | 4,689             |
| Year FE            | Yes                                                             | No                  | No                  | Yes                  | No                   | No                |
| Firm FE            | Yes                                                             | Yes                 | No                  | Yes                  | Yes                  | No                |
| Agency FE          | Yes                                                             | No                  | Yes                 | Yes                  | No                   | Yes               |
| Agency-by-Year FE  | No                                                              | Yes                 | No                  | No                   | Yes                  | No                |
| Firm-by-Year FE    | No                                                              | No                  | Yes                 | No                   | No                   | Yes               |
| Adj R <sup>2</sup> | 0.0868                                                          | 0.0938              | 0.0930              | 0.103                | 0.105                | 0.0997            |

**Table A.9. Corporate ESG Profiles and Firm-Charity Board Connections**

This table presents results from firm-charity-year level OLS regressions, following the regression equation:

$$Connected_{i,j,t} = \beta \cdot ESG\ Score_{i,t-1} + \lambda \cdot Controls_{i,j,t-1} + \alpha_{i,j} + \alpha_t + \epsilon_{i,j,t}$$

$Connected_{i,j,t}$  is a dummy variable equal to one if firm  $i$  and charity  $j$  share a director on their boards in year  $t$  and zero otherwise.  $ESG\ Score_{i,t-1}$  is firm  $i$ 's Refinitiv ESG score measured at year  $t-1$ . Alternatively, in Columns 2 to 5,  $ESG\ Score_{i,t-1}$  is replaced with  $ES\ Score_{i,t-1}$ ,  $E\ Score_{i,t-1}$ , or  $S\ Score_{i,t-1}$ , all according to Refinitiv, or Scope 1 emission intensity  $y_{i,t-1}$  according to S&P TruCost. We control for the logarithm of charity assets and several firm characteristics including the log of total assets, ROA, Tobin's Q, and total debt as a fraction of assets, all measured at  $t-1$ . Firm-by-charity and year fixed effects are included as well. Standard errors are clustered at the firm-by-charity level (\*\*\*)  $p < 0.01$ , \*\*  $p < 0.05$ , \*  $p < 0.1$ ).

|                            | Dependent Variable: Connected |                     |                     |                     |                     |
|----------------------------|-------------------------------|---------------------|---------------------|---------------------|---------------------|
|                            | (1)                           | (2)                 | (3)                 | (4)                 | (5)                 |
| ESG Score                  | 0.000<br>(0.001)              |                     |                     |                     |                     |
| ES Score                   |                               | 0.000<br>(0.000)    |                     |                     |                     |
| E Score                    |                               |                     | 0.000<br>(0.000)    |                     |                     |
| S Score                    |                               |                     |                     | 0.000<br>(0.000)    |                     |
| Scope 1 Emission Intensity |                               |                     |                     |                     | 0.000<br>(0.000)    |
| log(Charity Assets)        | 0.040**<br>(0.020)            | 0.038*<br>(0.020)   | 0.038*<br>(0.020)   | 0.038*<br>(0.020)   | 0.046***<br>(0.015) |
| log(Firm Assets)           | 0.069***<br>(0.018)           | 0.071***<br>(0.019) | 0.071***<br>(0.019) | 0.071***<br>(0.019) | 0.060***<br>(0.013) |
| ROA                        | 0.035<br>(0.069)              | 0.030<br>(0.069)    | 0.031<br>(0.069)    | 0.031<br>(0.069)    | 0.148**<br>(0.060)  |
| Q                          | 0.021**<br>(0.009)            | 0.021**<br>(0.009)  | 0.021**<br>(0.009)  | 0.021**<br>(0.009)  | 0.009<br>(0.007)    |
| Firm Debt/Assets           | 0.011<br>(0.067)              | 0.006<br>(0.068)    | 0.008<br>(0.068)    | 0.005<br>(0.068)    | 0.028<br>(0.054)    |
| Observations               | 25,766                        | 25,739              | 25,739              | 25,737              | 33,808              |
| Firm-Charity FE            | Yes                           | Yes                 | Yes                 | Yes                 | Yes                 |
| Year FE                    | Yes                           | Yes                 | Yes                 | Yes                 | Yes                 |
| Adj R <sup>2</sup>         | 0.399                         | 0.400               | 0.400               | 0.400               | 0.333               |

**Table A.10. Board Connections and Connected *Firm* Lobbying**

This table presents results from firm-charity-year level OLS regressions of  $CFL\ Scaled_{i,j,t}$  on  $Connected_{i,j,t-1}$ , following the regression equation:

$$CFL\ Scaled_{i,j,t} = \beta \cdot Connected_{i,j,t-1} + \lambda \cdot Controls_{i,j,t-1} + \alpha_{i,j} + \alpha_t + \epsilon_{i,j,t}$$

$CFL_{i,j,t}$  is the weighted average of firm  $i$ 's dollar lobbying across all topics where both firm  $i$  and charity  $j$  lobby, where the weights are the lobbying expenditures of charity  $j$  in each topic.  $CFL\ Scaled_{i,j,t}$  is  $CFL_{i,j,t}$  divided by lagged firm assets. Alternatively, we use  $CFLVS\ Scaled_{i,j,t}$ , which excludes commonly lobbied topics such as budget, tax, and immigration.  $Connected_{i,j,t-1}$  is a dummy variable equal to one if firm  $i$  and charity  $j$  shared a director on their boards in year  $t-1$  and zero otherwise. We control for the logarithm of charity assets and several firm characteristics including the log of total assets, ROA, Tobin's Q, and total debt as a fraction of assets, all measured at  $t-1$ . Year fixed effects are included in all specifications. Firm and charity, or firm-by-charity, fixed effects are included as well. Standard errors are clustered at the firm-by-charity level (\*\*\*)  $p < 0.01$ , \*\*  $p < 0.05$ , \*  $p < 0.1$ ).

|                     | Dependent Variable: |                     |                     |                     |
|---------------------|---------------------|---------------------|---------------------|---------------------|
|                     | CFL Scaled          | CFL Scaled          | CFLVS Scaled        | CFLVS Scaled        |
|                     | (1)                 | (2)                 | (3)                 | (4)                 |
| Connected           | 0.000<br>(0.000)    | 0.000<br>(0.000)    | 0.000<br>(0.000)    | 0.000<br>(0.000)    |
| log(Charity Assets) | 0.000<br>(0.000)    | 0.000<br>(0.000)    | -0.000<br>(0.000)   | 0.000<br>(0.000)    |
| log(Firm Assets)    | -0.000<br>(0.000)   | -0.000<br>(0.000)   | 0.000<br>(0.000)    | 0.000<br>(0.000)    |
| ROA                 | 0.001***<br>(0.000) | 0.001***<br>(0.000) | 0.003***<br>(0.001) | 0.003***<br>(0.001) |
| Q                   | 0.000**<br>(0.000)  | 0.000**<br>(0.000)  | 0.000***<br>(0.000) | 0.000***<br>(0.000) |
| Firm Debt/Assets    | -0.000*<br>(0.000)  | -0.000*<br>(0.000)  | -0.001<br>(0.001)   | -0.001<br>(0.001)   |
| Observations        | 56,590              | 56,559              | 56,590              | 56,559              |
| Firm FE             | Yes                 | No                  | Yes                 | No                  |
| Charity FE          | Yes                 | No                  | Yes                 | No                  |
| Firm-Charity FE     | No                  | Yes                 | No                  | Yes                 |
| Year FE             | Yes                 | Yes                 | Yes                 | Yes                 |
| Adj R <sup>2</sup>  | 0.360               | 0.435               | 0.306               | 0.397               |
